# Supplementary material for: Metagenomics and Faecal Metabolomics Integrative Analysis towards the Impaired Glucose Regulation and Type 2 Diabetes in Uyghur-Related Omics
Source: Hindawi journal article supplement (doi:10.1155/2019/2893041), 2019-11-18
Supplement: f1 [file 2893041.f1.pdf]

Supplementary Table 1: Annotated differentially enriched metabolites between the newly diagnosed T2DM and IGR groups

Supplementary Table 2: Annotated differentially enriched metabolites between the newly diagnosed T2DM and NGT groups

Supplementary Table 3: Annotated differentially enriched metabolites between the IGR and NGT groups

Supplementary Figure 1: Box plot of COG function classification. Microbial sequences mapped by Greengenes database, the functional gene contents of the gut microbiota were predicted by PICRUSt and were mapped on COG.

Supplementary Figure 2: Correlation heatmap of differentially enriched metabolites and gut microbiota phylum between the newly diagnosed T2DM and IGR group (a); Correlation heatmap of differentially enriched metabolites and gut microbiota phylum between the newly diagnosed IGR and NGT group (b)

Note: Each column in the graph represents a metabolite, each row represents a microbiota phylum, the colour in the graph indicates the Pearson coefficient between the bacterial phylum and the metabolite, and the red colour indicates positive correlation. The green colour is representative negative correlation. The darker colour indicate the greater the correlation. \* is represents a significant correlation ( $P < 0.05$ ).

Supplementary Figure 3: Correlation heatmap of differentially enriched metabolites and gut microbiota genus between the newly diagnosed T2DM and IGR group (a); Correlation heatmap of differentially enriched metabolites and gut microbiota genus between the newly diagnosed IGR and NGT group (b).

Note: Each column in the graph represents a metabolite, each row represents a microbiota genus, the colour in the graph indicates the Pearson coefficient between the bacterial genus and the metabolite, and the red colour indicates positive correlation. The green colour is representative negative correlation. The darker colour indicate the greater the correlation. \* is represents a significant correlation ( $P < 0.05$ ).

Supplementary Figure 4: Correlation heatmap of differentially enriched metabolites and gut microbiota phylum level between the newly diagnosed T2DM and NGT group (a), Correlation heatmap of differentially enriched metabolites and gut microbiota genus level between the newly diagnosed T2DM and NGT group (b).

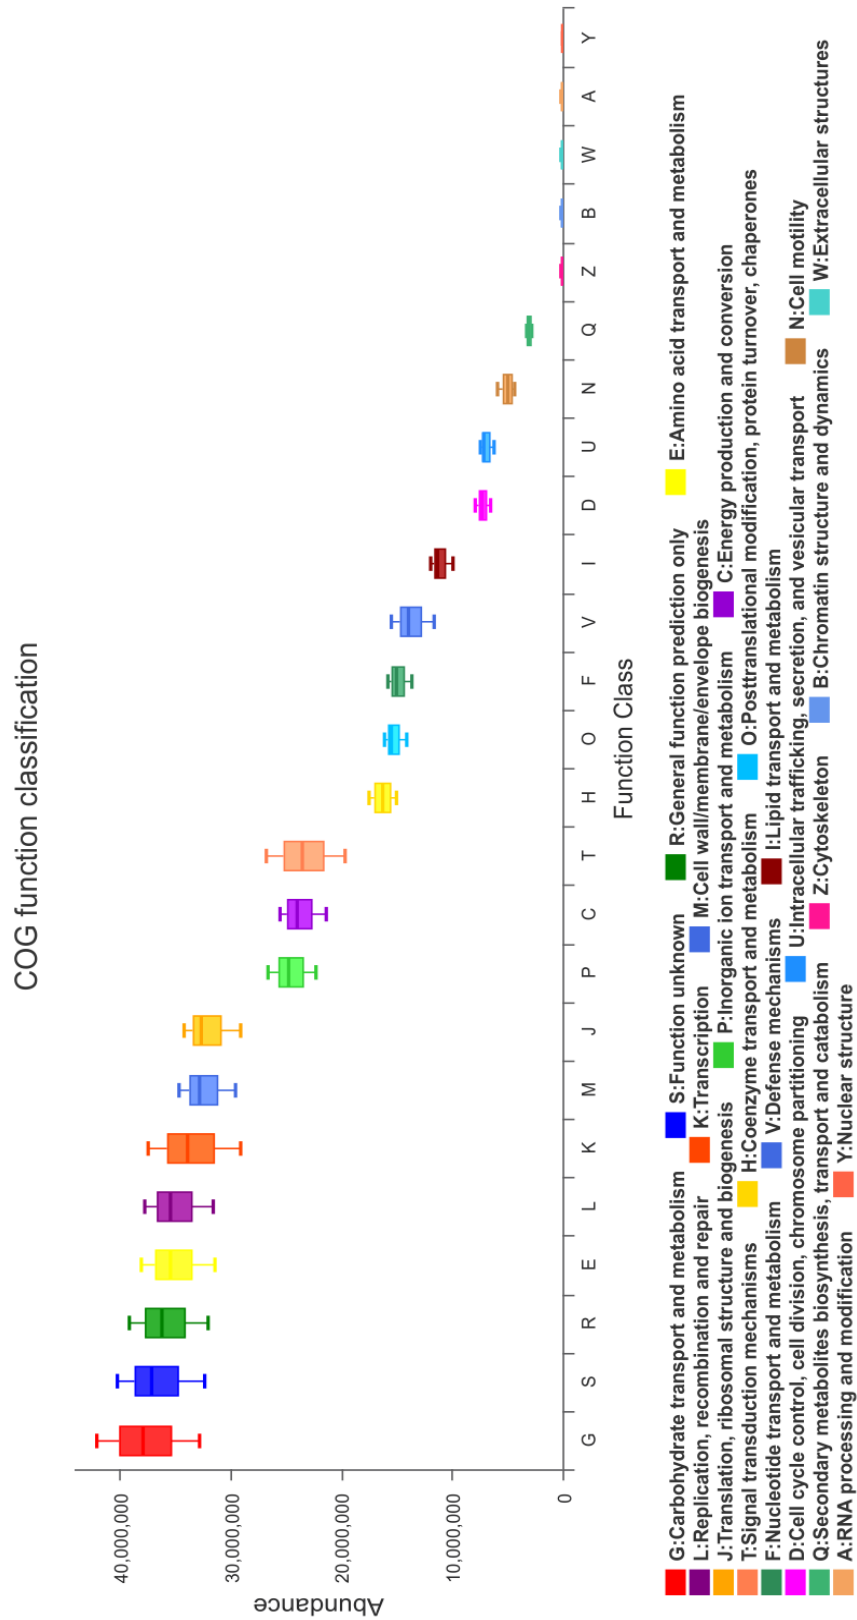

1  
2  
3  
4  
5  
6  
7

Supplementary Figure 1: Box plot of COG function classification. Microbial sequences mapped by Greengenes database, the functional gene contents of the gut microbiota were predicted by PICRUSt and were mapped on COG.

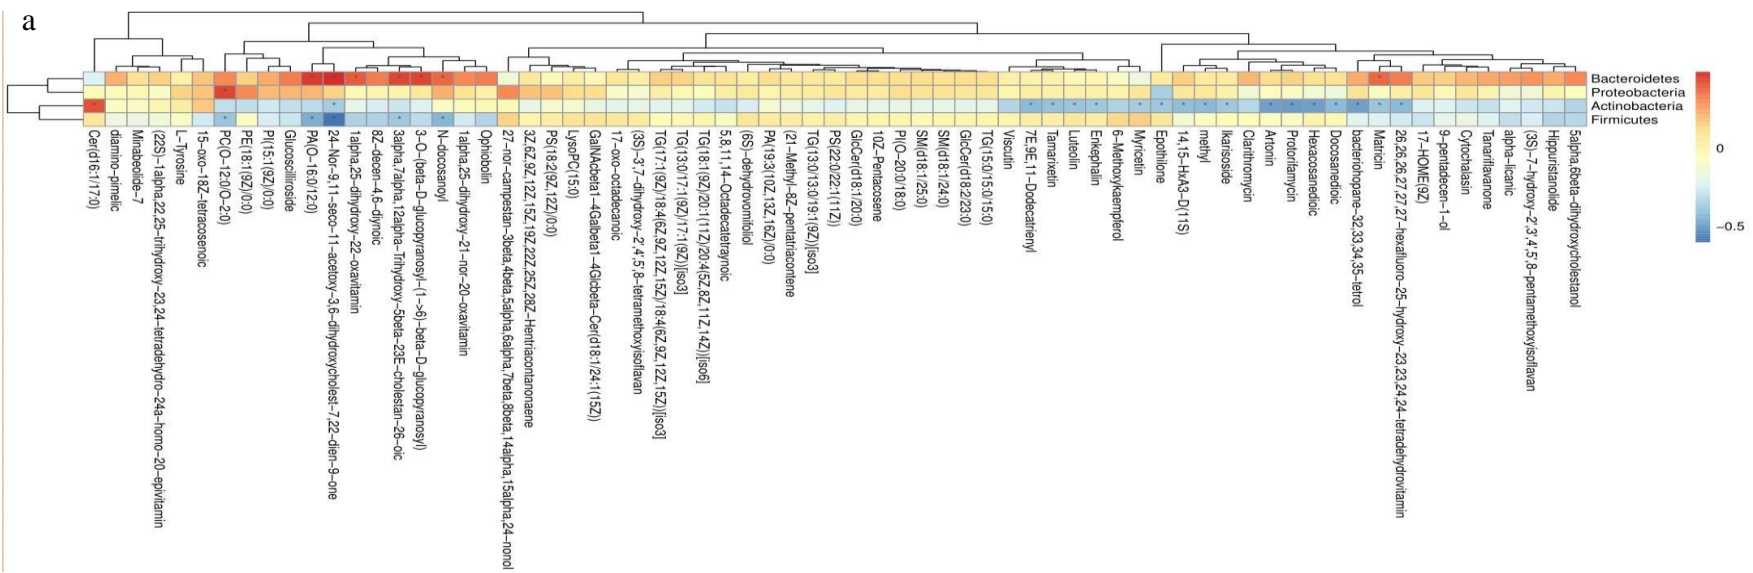

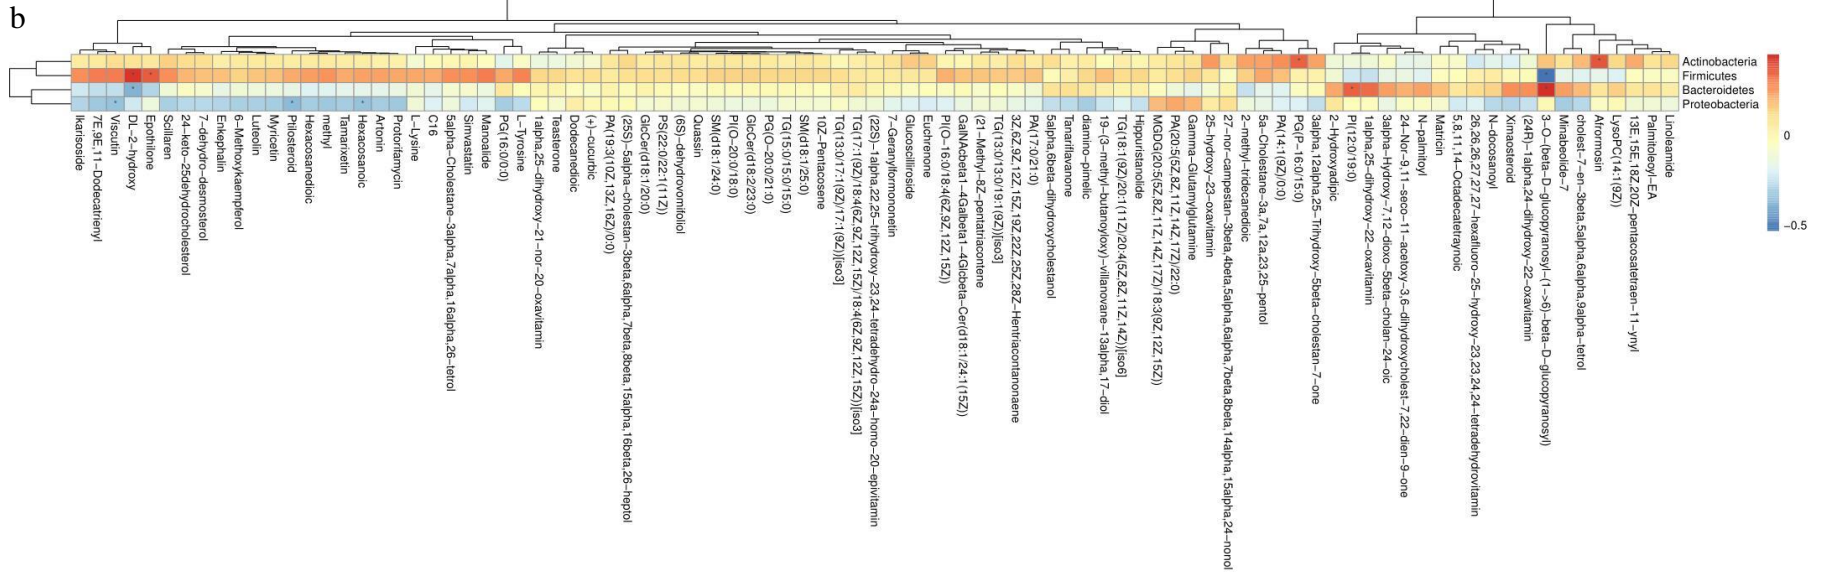

Supplementary Figure 2: Correlation heatmap of differentially enriched metabolites and gut microbiota phylum between the newly diagnosed T2DM and IGR group (a); Correlation heatmap of differentially enriched metabolites and gut microbiota phylum between the newly diagnosed IGR and NGT group (b)

Note: Each column in the graph represents a metabolite, each row represents a microbiota phylum, the colour in the graph indicates the Pearson coefficient between the bacterial phylum and the metabolite, and the red colour indicates positive correlation. The green colour is representative negative correlation. The darker colour indicate the greater the correlation. \* is represents a significant correlation ( $P < 0.05$ ).

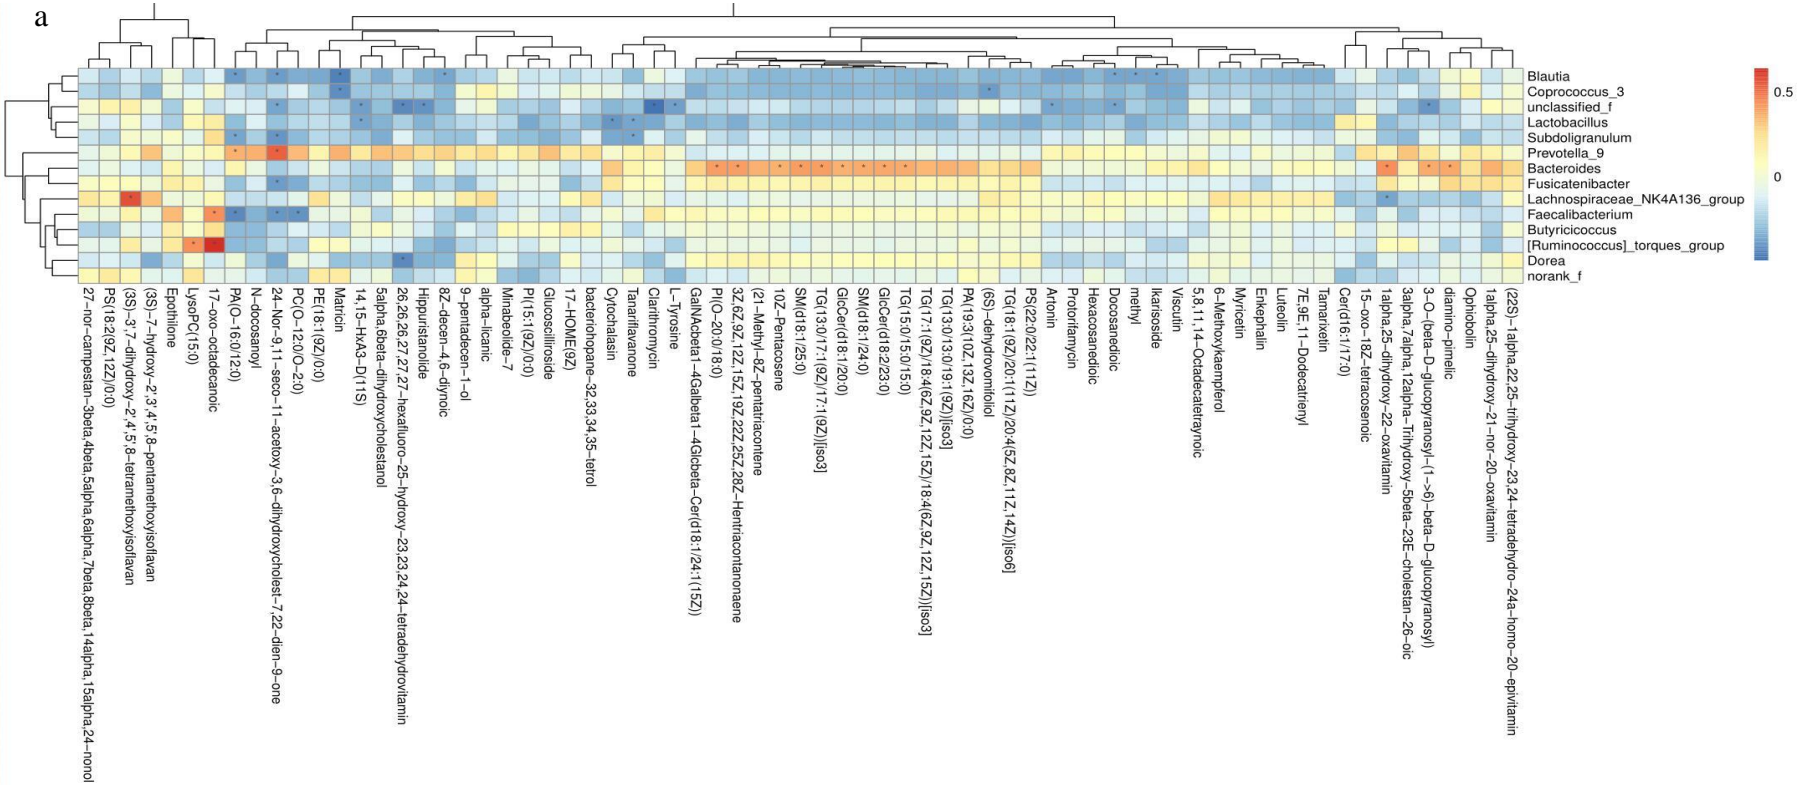

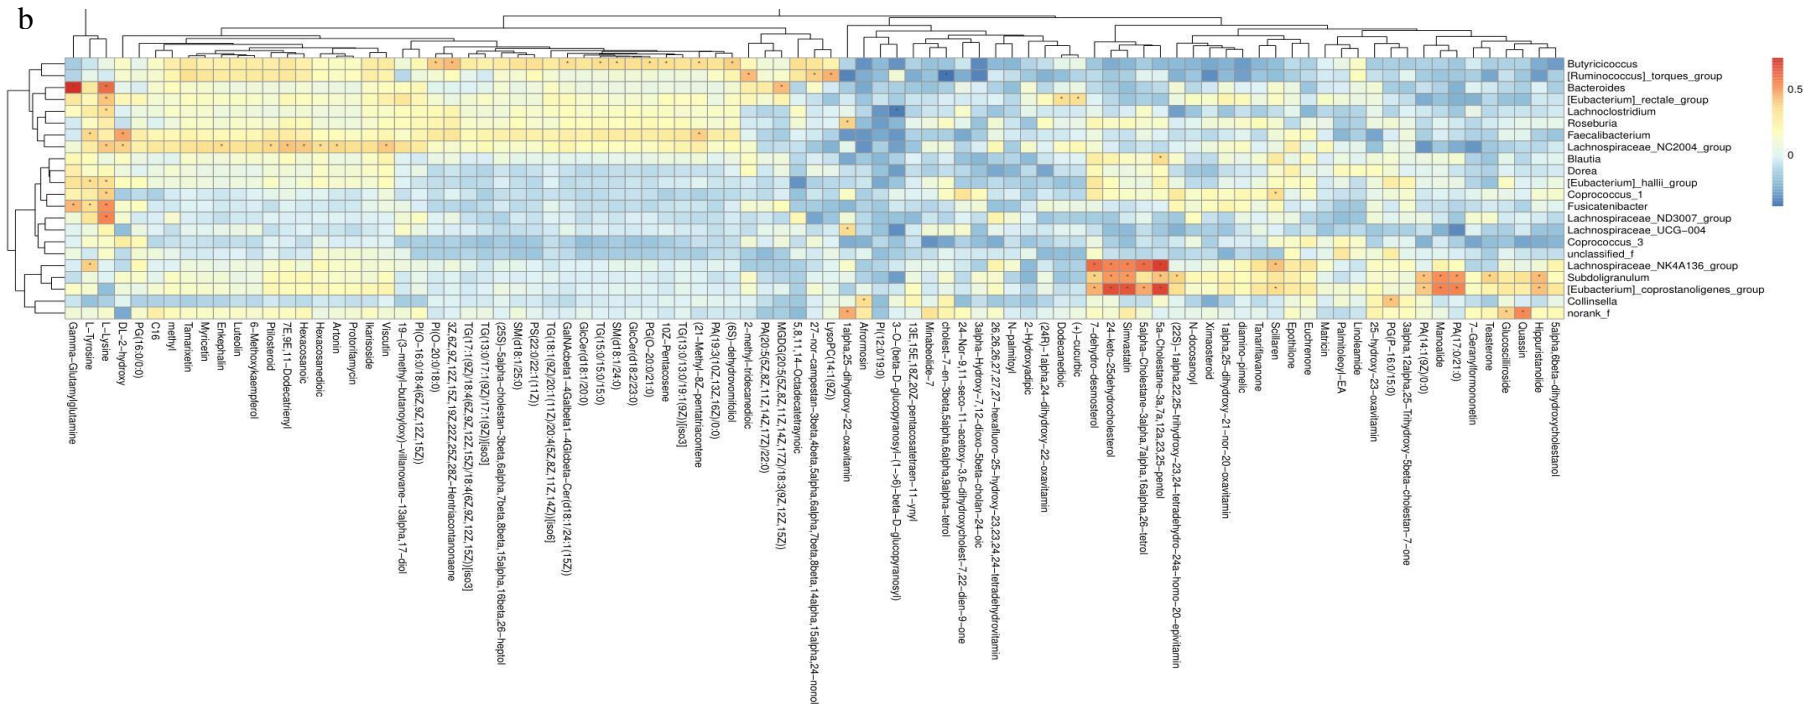

Supplementary Figure 3: Correlation heatmap of differentially enriched metabolites and gut microbiota genus between the newly diagnosed T2DM and IGR group (a); Correlation heatmap of differentially enriched metabolites and gut microbiota genus between the newly diagnosed IGR and NGT group (b).

Note: Each column in the graph represents a metabolite, each row represents a microbiota genus, the colour in the graph indicates the Pearson coefficient between the bacterial genus and the metabolite, and the red colour indicates positive correlation. The green colour is representative negative correlation. The darker colour indicate the greater the correlation. \* is represents a significant correlation ( $P < 0.05$ ).



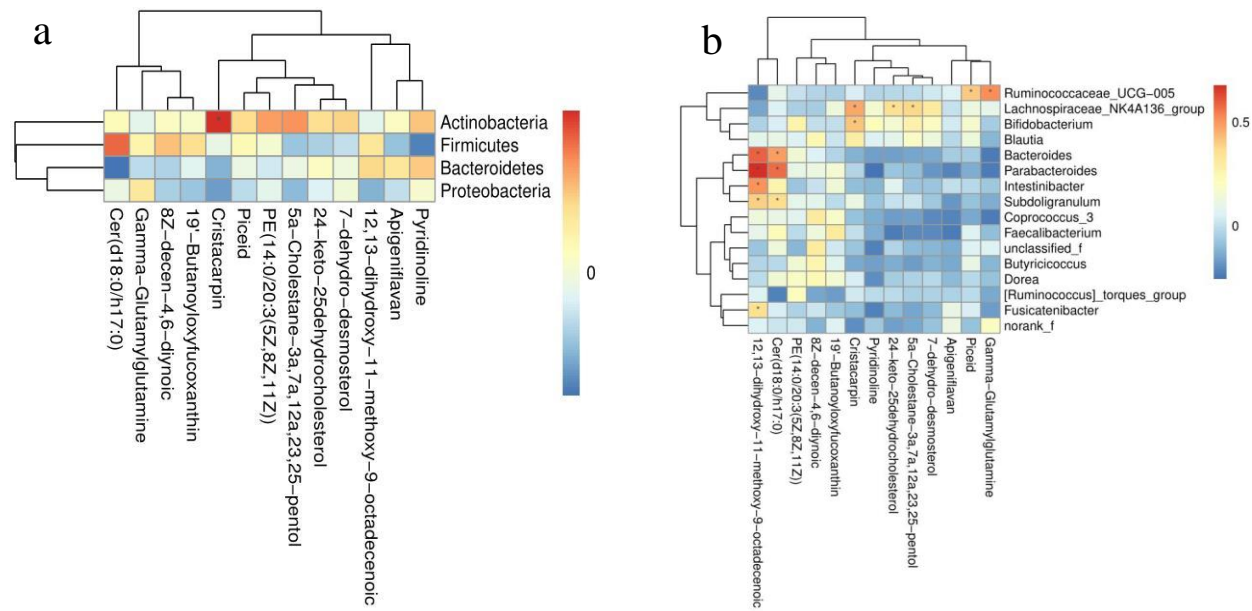

42  
43  
44  
45  
46

Supplementary Figure 4: Correlation heatmap of differentially enriched metabolites and gut microbiota phylum level between the newly diagnosed T2DM and NGT group (a), Correlation heatmap of differentially enriched metabolites and gut microbiota genus level between the newly diagnosed T2DM and NGT group (b).

1

Supplementary Table 1: Annotated differentially enriched metabolites between the newly diagnosed T2DM and IGR groups

| Metabolites                       | m/z    | RT (min) | Compound ID    | Formula    | VIP value | P value | FC (T2DM/IGR) | Pathways                                                    | superclass                       | class                            | subclass                             |
|-----------------------------------|--------|----------|----------------|------------|-----------|---------|---------------|-------------------------------------------------------------|----------------------------------|----------------------------------|--------------------------------------|
| L-Tyrosine                        | 180.07 | 1.14     | HMDB00158      | C9H11NO3   | 1.36      | 0.00    | 1.64          | Phenylalanine, tyrosine and tryptophan biosynthesis         | Organic acids and derivatives    | Carboxylic acids and derivatives | Amino acids, peptides, and analogues |
| Epothilone A                      | 476.25 | 5.84     | LMPK04000040   | C26H39NO6S | 4.02      | 0.03    | 0.79          | Type I polyketide structures                                | Lipids and lipid-like molecules  | Polyketides                      | Macrolides and lactone polyketides   |
| Anhydrorhodovibrin                | 565.44 | 6.68     | LMPR01070135   | C41H58O    | 1.86      | 0.01    | 3.27          | Metabolic pathways,Carotenoid biosynthesis                  | Lipids and lipid-like molecules  | Prenol lipids                    | Isoprenoids                          |
| Protorifamycin I                  | 657.34 | 11.13    | LMPK05000007   | C35H45NO10 | 1.71      | 0.00    | 0.78          | Biosynthesis of ansamycins,Biosynthesis of antibiotics      | Phenylpropanoids and polyketides | Coumarins and derivatives        | Furanocoumarins                      |
| Pimelic acid                      | 159.07 | 1.16     | LMFA01170051   | C7H12O4    | 1.04      | 0.05    | 0.15          | Metabolic pathways                                          | Lipids and lipid-like molecules  | Fatty acyls                      | Fatty acids and conjugates           |
| LysoPC(15:0)                      | 480.31 | 6.26     | HMDB10381      | C23H48NO7P | 5.44      | 0.05    | 0.36          | Glycerophospholipid metabolism,Choline metabolism in cancer | Lipids and lipid-like molecules  | Glycerophospholipids             | Glycerophosphocholines               |
| Matricin                          | 613.30 | 2.35     | LMPR0103410003 | C17H22O5   | 3.11      | 0.02    | 0.64          | Unknown                                                     | Organoheterocyclic compounds     | Lactones                         | Gamma butyrolactones                 |
| bacteriohopane-32,33,34,35-tetrol | 564.50 | 7.83     | LMPR04000004   | C35H62O4   | 1.80      | 0.05    | 2.06          | Unknown                                                     | Lipids and lipid-like molecules  | Prenol lipids                    | Hopanoids                            |
| 5alpha,6beta-dihydroxycholestanol | 443.35 | 5.23     | LMST01010052   | C27H48O3   | 1.41      | 0.02    | 1.33          | Unknown                                                     | Lipids and lipid-like molecules  | Sterol lipids                    | Sterols                              |
| Cytochalasin A                    | 460.25 | 2.12     | LMPK11000001   | C29H35NO5  | 1.24      | 0.02    | 1.26          | Unknown                                                     | Lipids and lipid-like molecules  | Polyketides                      | Cytochalasins                        |
| (6S)-dehydrovomifoliol            | 221.12 | 3.27     | LMPR0103050009 | C13H18O3   | 1.08      | 0.00    | 0.74          | Unknown                                                     | Lipids and lipid-like molecules  | Prenol lipids                    | Isoprenoids                          |

2  
3  
4  
5  
6  
7  
8  
9  
10  
11  
12



13  
14  
15

Supplementary Table 2: Annotated differentially enriched metabolites between the newly diagnosed T2DM and NGT groups

| Metabolites             | m/z    | RT (min) | Compound ID  | Formula    | VIP value | p value | Pathways                                 | superclass                       | class                            | subclass                             |
|-------------------------|--------|----------|--------------|------------|-----------|---------|------------------------------------------|----------------------------------|----------------------------------|--------------------------------------|
| Cristacarpin            | 355.15 | 3.25     | LMPK12070114 | C21H22O5   | 3.85      | 0.03    | Unknown                                  | Phenylpropanoids and polyketides | Isoflavonoids                    | Furanoisoflavonoids                  |
| Piceid                  | 373.13 | 2.35     | LMPK13090012 | C20H22O8   | 3.49      | 0.01    | Unknown                                  | Phenylpropanoids and polyketides | Stilbenes                        | Stilbene glycosides                  |
| 7-dehydro-desmosterol   | 383.33 | 4.95     | LMST01010121 | C27H42O    | 2.63      | 0.00    | Steroid biosynthesis, Metabolic pathways | Lipids and lipid-like molecules  | Sterol lipids                    | Sterols                              |
| PE(14:0/20:3)           | 712.49 | 9.32     | HMDB08836    | C39H72NO8P | 1.78      | 0.02    | Unknown                                  | Lipids and lipid-like molecules  | Glycerophospholipids             | Glycerophosphoethanolamines          |
| Gamma-Glutamylglutamine | 274.10 | 0.64     | HMDB11738    | C10H17N3O6 | 1.19      | 0.03    | Unknown                                  | Organic acids and derivatives    | Carboxylic acids and derivatives | Amino acids, peptides, and analogues |

16  
17  
18  
19  
20  
21  
22  
23  
24  
25  
26  
27  
28  
29  
30  
31  
32  
33  
34  
35  
36  
37

Supplementary Table 3: Annotated differentially enriched metabolites between the IGR and NGT groups

| Metabolites                       | m/z    | RT (min) | Compound ID   | Formula    | VIP value | p value | FC (IGR/NGT) | Pathways                                                                                | superclass                       | class                            | subclass                             |
|-----------------------------------|--------|----------|---------------|------------|-----------|---------|--------------|-----------------------------------------------------------------------------------------|----------------------------------|----------------------------------|--------------------------------------|
| Dodecanedioic acid                | 229.14 | 3.27     | HMDB00623     | C12H22O4   | 4.60      | 0.01    | 2.43         | Biosynthesis of secondary metabolites, alpha-Linolenic acid metabolism                  | Lipids and lipid-like molecules  | Fatty acyls                      | Fatty acids and conjugates           |
| Matricin                          | 613.30 | 2.35     | LMPR010341003 | C17H22O5   | 3.05      | 0.01    | 1.68         | unknown                                                                                 | Organoheterocyclic compounds     | Lactones                         | Gamma butyrolactones                 |
| L-Tyrosine                        | 180.07 | 1.14     | HMDB00158     | C9H11NO3   | 2.67      | 0.00    | 0.47         |                                                                                         | Organic acids and derivatives    | Carboxylic acids and derivatives | Amino acids, peptides, and analogues |
| LysoPC(14:1)                      | 464.28 | 6.06     | HMDB10380     | C22H44NO7P | 2.59      | 0.01    | 2.92         | Choline metabolism in cancer, Glycerophospholipid metabolism                            | Lipids and lipid-like molecules  | Glycerophospholipids             | Glycerophosphocholines               |
| 7-dehydro-desmosterol             | 383.33 | 4.95     | LMST01010121  | C27H42O    | 2.23      | 0.01    | 0.58         | Steroid biosynthesis, metabolic pathways                                                | Lipids and lipid-like molecules  | Sterol lipids                    | Sterols                              |
| 5alpha,6beta-dihydroxycholestanol | 443.35 | 5.23     | LMST01010052  | C27H48O3   | 2.15      | 0.01    | 0.66         | unknown                                                                                 | Lipids and lipid-like molecules  | Sterol lipids                    | Sterols                              |
| Epothilone A                      | 476.25 | 5.84     | LMPK04000040  | C26H39NO6S | 1.96      | 0.04    | 1.24         | Type I polyketide structures                                                            | Lipids and lipid-like molecules  | Polyketides                      | Macrolides and lactone polyketides   |
| Protorifamycin I                  | 657.34 | 11.13    | LMPK05000007  | C35H45NO10 | 1.90      | 0.00    | 1.29         | Biosynthesis of ansamycins, Biosynthesis of antibiotics                                 | Phenylpropanoids and polyketides | Coumarins and derivatives        | Furanocoumarins                      |
| (+)-cucurbitic acid               | 211.13 | 3.27     | LMFA02020013  | C12H20O3   | 1.62      | 0.00    | 1.91         | unknown                                                                                 | Lipids and lipid-like molecules  | Sterol lipids                    | Sterols                              |
| Teasterone                        | 447.35 | 5.63     | LMST01030121  | C28H48O4   | 1.61      | 0.01    | 0.37         | Biosynthesis of secondary metabolites, Brassinosteroid biosynthesis, Metabolic pathways | Lipids and lipid-like molecules  | Fatty acyls                      | Octadecanoids                        |
| Manoalide                         | 415.25 | 3.85     | LMPR010502001 | C25H36O5   | 1.59      | 0.01    | 0.40         | unknown                                                                                 | Lipids and lipid-like molecules  | Sterol lipids                    | Sterols                              |
| Gamma-Glutamylglutamine           | 274.10 | 0.64     | HMDB11738     | C10H17N3O6 | 1.50      | 0.00    | 0.43         | unknown                                                                                 | Organic acids and derivatives    | Carboxylic acids and derivatives | Amino acids, peptides, and analogues |
| (6S)-dehydrovomifoliol            | 221.12 | 3.27     | LMPR010305009 | C13H18O3   | 1.25      | 0.01    | 1.35         | unknown                                                                                 | Lipids and lipid-like molecules  | Prenol lipids                    | Isoprenoids                          |
| Estrone 3-glucuronide             | 445.19 | 1.40     | LMST05010011  | C24H30O8   | 1.22      | 0.00    | 0.09         | Steroid hormone biosynthesis                                                            | Lipids and lipid-like molecules  | Steroids and steroid derivatives | Steroidal glycosides                 |
| Anhydrosorbidol                   | 565.44 | 6.68     | LMPR01070135  | C41H58O    | 1.17      | 0.02    | 0.37         | Carotenoid biosynthesis, Metabolic                                                      | Lipids and lipid-like molecules  | Prenol lipids                    | Isoprenoids                          |

|                      |            |      |                    |           |      |      |      | pathways |                                     |                                     |                                            |
|----------------------|------------|------|--------------------|-----------|------|------|------|----------|-------------------------------------|-------------------------------------|--------------------------------------------|
| Quassin              | 389.2<br>0 | 2.68 | LMPR01061100<br>02 | C22H28O6  | 1.11 | 0.02 | 0.71 | unknown  | Lipids and lipid-<br>like molecules | Prenol lipids                       | Terpene lactones                           |
| Scillaren A          | 715.3<br>3 | 2.30 | LMST01130005       | C36H52O13 | 1.03 | 0.04 | 0.74 | unknown  | Lipids and lipid-<br>like molecules | Sterol lipids                       | Sterols                                    |
| 2-Hydroxyadipic acid | 161.0<br>5 | 0.64 | LMFA01170049       | C6H10O5   | 1.01 | 0.04 | 1.97 | unknown  | Lipids and lipid-<br>like molecules | Fatty acyls                         | Fatty acids and<br>conjugates              |
| L-Lysine             | 145.1<br>0 | 0.55 | HMDB00182          | C6H14N2O2 | 1.01 | 0.00 | 0.46 |          | Organic acids<br>and derivatives    | Carboxylic acids<br>and derivatives | Amino acids,<br>peptides, and<br>analogues |
